# Supplementary material
Source: HighWire-hosted journal article supplement (http://www.annfammed.org/highwire/filestream/13102/field_highwire_adjunct_files/0/Lim_Supp_Figures_1-2.pdf)

**Supplemental materials for:**

Lim W, Wong W. COVID-19: Notes from the front line, Singapore's primary health care perspective. *Ann Fam Med.* 2020;18(3):259-261.

---

## Supplemental Figure 1. Health declaration form and triage protocol.

### Health Declaration Form

Name: \_\_\_\_\_  
姓名:

NRIC/Passport Number: \_\_\_\_\_  
身份证 / 护照号码:

Date of Visit: \_\_\_\_\_

#### Screening Questionnaire

##### 健康申报问题

1. Are you currently having fever OR any flu symptoms such as coughing, running nose, sore throat?  Yes 有  No 没有  
您目前有发烧或任何流感症状，例如咳嗽，流鼻涕，喉咙痛吗？
2. Are you currently having chest tightness or breathing difficulties?  Yes 有  No 没有  
您目前感到胸闷或呼吸困难吗？
3. Are you currently serving leave of absence (compulsory leave from work due to recent close contact or travel to high risk areas)?  Yes 有  No 没有  
您目前还在缺席假的期间吗？(这是指由于最近与患者密切接触或因为前往高风险地区而导致的强制性休假)
4. Have you been a close contact or exposed to a confirmed case or suspect case of Covid-19 (Wuhan pneumonia) in the last 14 days before the onset of symptoms?  Yes 有  No 没有  
在症状发作之前的 14 天，您是否有密切接触或接触确诊的 Covid-19(武汉肺炎) 病例或可疑病例？
5. Have you travelled to other countries in the last 14 days before the onset of symptoms?  Yes 有  No 没有  
在症状发作之前的 14 天，您曾去过其他国家吗？

Please list down the countries you had travelled to.  
请列出您去过的国家。

\_\_\_\_\_

6. Have you visited any hospital in other countries in the last 14 days before the onset of symptoms?  Yes 有  No 没有  
您是否在症状发作前的 14 天到过您是否去过其他国家的任何医院？

Patient's temperature: \_\_\_\_\_

#### Staff instruction

##### Staff to note

1. **Yes to Q2 +/- fever>38** = provide mask, wait at ARI area and notify Doctor immediately to see at isolation
2. **Yes to Q1 +/- fever>38** = provide mask, wait at Acute Respiratory Infection (ARI area) and see in isolation
3. **Fever>38 + Yes to any Q3 to Q6** = provide mask, wait at Acute Respiratory Infection (ARI area) and see in isolation
4. **Fever>38 + No to all questions** = provide mask, wait at non-ARI area
5. **Yes to any Q3 to Q6, but no fever and no to Q1 and Q2**= provide mask, ask reason for encounter
  - If vomiting or diarrhoea symptoms, wait at ARI area and see in isolation
  - No symptoms and coming for routine healthcheck= wait at non-ARI area
  - Other symptoms not related to respiratory symptoms or gastrointestinal symptoms= wait at non-ARI area, notify doctor

**Supplemental Figure 2. Personal protective equipment.**

---

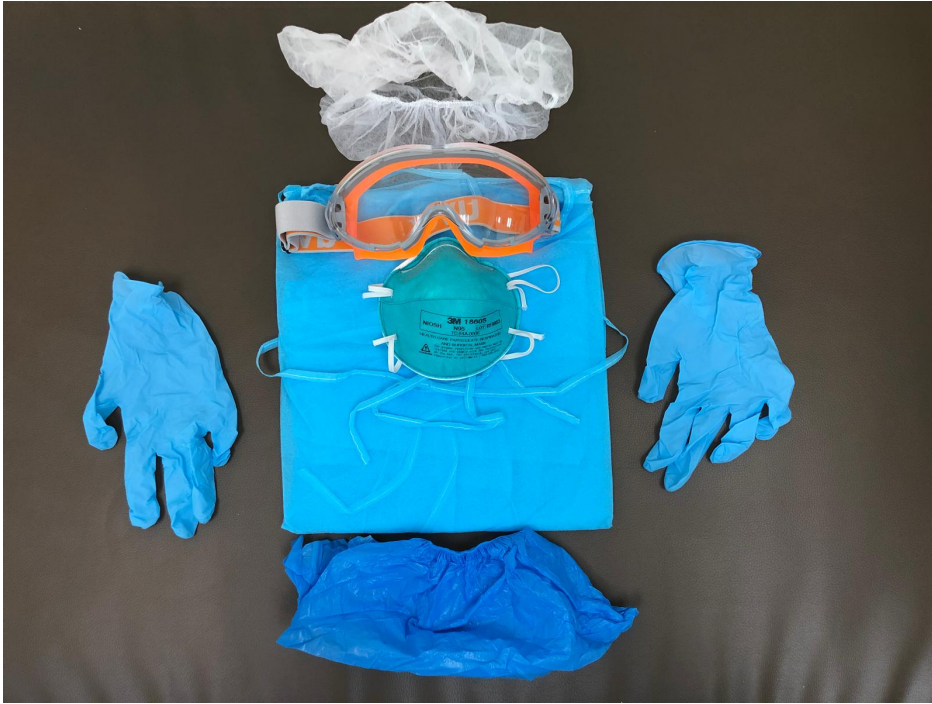

Supplement: Lim_Supp_Figures_1-2.pdf [file Lim_Supp_Figures_1-2.pdf]
